# Supplementary material for: A component of the TOR (Target Of Rapamycin) nutrient-sensing pathway plays a role in circadian rhythmicity in Neurospora crassa
Source: PubMed Central journal article supplement (PMC6028147; doi:10.1371/journal.pgen.1007457), 2018-06-20
Supplement: pgen.1007457.s001.pdf [file pgen.1007457.s001.pdf]

**S1 Table. CAPS markers used in mapping the *uv90* mutation**

| Marker Name | Restriction Enzyme | PCR Primers                                      | SNP location (bp) on LG VI and PCR product location | SNP (OR > MV) | OR phenotype |
|-------------|--------------------|--------------------------------------------------|-----------------------------------------------------|---------------|--------------|
| LCF2-LCR2   | HaeIII             | TTTGAGCTCGGGATTTGCTG<br>GGGCGCCATCAATTTCACTT     | 1,900,315<br>1,900,164-1,900,640                    | C > T         | cut          |
| F11-R11     | Taq $\alpha$ 1     | CGATACGATTCTTGGCATCAGC<br>GGTAACTATGTACATGCCCGTG | 2,075,827<br>2,075,729-2,076,173                    | G > A         | cut          |
| F9-R9*      | Taq $\alpha$ 1     | AAGGTCGGTGTGTTAGACGA<br>GGCTGAGGGTGGATAGCTAGA    | 2,225,382<br>2,225,160-2,225,620                    | A > C         | cut          |
| F6-R6       | EcoRI              | TTCACGAGTGTCCCGGATGTG<br>GCATTGTTCATCTCGTTGGTGC  | ***<br>2,493,864-2,495,098                          | ***           | cut          |
| RCF5-RCR5   | Taq $\alpha$ 1     | GCGAATTGGAAATCTCCAAGGG<br>ATCTCCACGTAGCCTTGGCTT  | 3,102,537<br>3,102,391-3,102,921                    | G > A         | cut          |
| 6-68-MspI** | MspI               | ATGTCTTGGGTGTTTGGCAT<br>TCCTCAAGATCGTCACTCAGC    | ***<br>3,293,478-3,294,201                          | ***           | uncut        |
| 3317F-3317R | Taq $\alpha$ 1     | CTCGGACGACAAGTCACCAACA<br>CGTCCCTCTGATGCCCAAAGTA | 3,317,544<br>3,317,357-3,317,859                    | A > G         | cut          |
| 3368F-3368R | MseI               | GAAATACCGGGCGCATTACCA<br>TGTTGATTGGCTGTCGGTGG    | 3,368,360<br>3,368,165-3,368,692                    | T > C         | cut          |
| 3395F-3395R | Taq $\alpha$ 1     | TTGCTTGCTTTGTCTCGGACG<br>ACAGAGTTGGGTGTTACGTGG   | 3,395,716<br>3,395,402-3,395,911                    | G > A         | cut          |
| 3436F-3436R | Taq $\alpha$ 1     | GGACAGCTTCTCCGAGCGATTT<br>CGTTGACGGACTCTGAATGAGG | 3,436,987<br>3,436,787-3,437,260                    | T > C         | cut          |
| F16-R16     | HaeIII             | ATCCAATCTCTTCCCGGTGTG<br>TCTTGGTTAGTGTAGCCGCACC  | 3,483,592<br>3,483,486-3,483,944                    | G > A         | cut          |

\* Marker and PCR primers from Lambrechts et al [70].

\*\* Marker and PCR primers from Jin et al [34].

\*\*\* Exact SNP location not known.
