# Supplementary material for: A component of the TOR (Target Of Rapamycin) nutrient-sensing pathway plays a role in circadian rhythmicity in Neurospora crassa
Source: PubMed Central journal article supplement (PMC6028147; doi:10.1371/journal.pgen.1007457), 2018-06-20
Supplement: pgen.1007457.s002.pdf [file pgen.1007457.s002.pdf]

**S2 Table. Recombination frequencies between the *uv90* mutation and CAPS markers**

| Marker     | Position on LG VI (bp) | Total progeny tested** | Total progeny recombinant | % recombination |
|------------|------------------------|------------------------|---------------------------|-----------------|
| LCF2-LCR2  | 1,900,315              | 29                     | 2                         | 6.9             |
| F11-R11    | 2,075,827              | 29                     | 2                         | 6.9             |
| F9-R9      | 2,225,382              | 29                     | 3                         | 10.3            |
| F6-R6      | approx. 2,494,480*     | 29                     | 3                         | 10.3            |
| centromere | 2,811,000 – 3,060,000  |                        |                           |                 |
| RCF5-RCR5  | 3,102,537              | 85                     | 8                         | 9.4             |
| 6-68-MspI  | approx. 3,293,840*     | 85                     | 3                         | 3.5             |
| F16-R16    | 3,483,592              | 85                     | 8                         | 9.4             |

\* Exact SNP location is not known.

\*\* Two different sets of progeny were tested on the left and right of the centromere.
