# Supplementary material for: A component of the TOR (Target Of Rapamycin) nutrient-sensing pathway plays a role in circadian rhythmicity in Neurospora crassa
Source: PubMed Central journal article supplement (PMC6028147; doi:10.1371/journal.pgen.1007457), 2018-06-20
Supplement: pgen.1007457.s003.pdf [file pgen.1007457.s003.pdf]

**S3 Table. ORF candidates for the *uv90* gene located on LG VI, from 3.293 to 3.369 Mbp**

| <b>Locus</b> | <b>Gene Name</b>                       | <b>Location (bp, LG VI)<br/>and strand (+ or -)</b> | <b>FGSC Stock #*</b> |
|--------------|----------------------------------------|-----------------------------------------------------|----------------------|
| NCU17127.7   | hypothetical protein                   | 3294468-3295683 +                                   | **                   |
| NCU05962.7   | hypothetical protein                   | 3303139-3303378 -                                   | 17845                |
| NCU05961.7   | DUF572 domain-containing protein       | 3304910-3306530 +                                   | 11909                |
| NCU05960.7   | GPI mannosyltransferase 2 (gt-761)     | 3306630-3309661 -                                   | **                   |
| NCU05959.7   | vesicle transport V-SNARE protein VTI1 | 3311937-3313502 -                                   | **                   |
| NCU05958.7   | hypothetical protein                   | 3315098-3318376 +                                   | 17842                |
| NCU05957.7   | hypothetical protein                   | 3319864-3322467 +                                   | 13721                |
| NCU05956.7   | glycosylhydrolase family 2-2 (gh2-2)   | 3322517-3326426 -                                   | 11310                |
| NCU05955.7   | Cel74a (gh74-1)                        | 3326807-3330420 +                                   | 13535                |
| NCU05954.7   | hypothetical protein                   | 3332004-3334639 -                                   | 17841                |
| NCU05953.7   | hypothetical protein                   | 3339700-3340998 -                                   | **                   |
| NCU05952.7   | hypothetical protein                   | 3341267-3343308 -                                   | 17839                |
| NCU05951.7   | hypothetical protein                   | 3344579-3346273 +                                   | 18085                |
| NCU05950.7   | hypothetical protein                   | 3347867-3348756 +                                   | 18029                |
| NCU05949.7   | hypothetical protein                   | 3349464-3350054 +                                   | 17838                |
| NCU05948.7   | unspecified product                    | 3353034-3355088 -                                   | 18213                |
| NCU05947.7   | hypothetical protein                   | 3355960-3356454 -                                   | 18028                |
| NCU12130.7   | hypothetical protein                   | 3362030-3364815 +                                   | **                   |
| NCU05946.7   | hypothetical protein                   | 3364883-3365627 -                                   | 17836                |
| NCU05945.7   | hypothetical protein                   | 3366104-3367798 -                                   | 17835                |
| NCU05944.7   | hypothetical protein                   | 3368035-3369538 +                                   | 13533                |

\*Stock numbers of available knockout strains produced by the *Neurospora* Functional Genomics Project [65].

\*\*Knockout strains of these genes were unavailable.
