# Supplementary material for: A component of the TOR (Target Of Rapamycin) nutrient-sensing pathway plays a role in circadian rhythmicity in Neurospora crassa
Source: PubMed Central journal article supplement (PMC6028147; doi:10.1371/journal.pgen.1007457), 2018-06-20
Supplement: pgen.1007457.s004.pdf [file pgen.1007457.s004.pdf]

**S4 Table. PCR primers used to analyze the UV90 mutation**

|    | Primer Name | Sequence<br>5'→3'                 | Location on<br>Linkage group VI<br>and strand (+/-) |
|----|-------------|-----------------------------------|-----------------------------------------------------|
| 1  | F6          | GAC ATT GGC CGC AGA TGG AT        | 3,345,920- 939 (+)                                  |
| 2  | F5          | GGA ACC TCC GAA GAA AGG AAG G     | 3,346,404- 425 (+)                                  |
| 3  | F4          | CCG GAT GAC TTC ATC TTC CCT G     | 3,346,862- 883 (+)                                  |
| 4  | F3          | CTT GGA ACC GCG CAG TAA CAT       | 3,348,428- 448 (+)                                  |
| 5  | F2          | TAC TTC GAC GAC GTC TGG CTT C     | 3,347,890- 911 (+)                                  |
| 6  | F1          | CCG TGA CAC ATT TGT TGC TGC       | 3,347,371- 391 (+)                                  |
| 7  | R1          | TCC GGA ACA GCA TCA GGA AAG       | 3,348,966- 986 (-)                                  |
| 8  | R2          | CAT GGG TTT ATC ATG CGG GAC       | 3,348,468- 488 (-)                                  |
| 9  | R3          | CCG TCG CGA AGA GAT GAA ACT C     | 3,347,852- 873 (-)                                  |
| 10 | R4          | AAA TGG CTG TGG TCG CAT CTC       | 3,349,471- 491 (-)                                  |
| 11 | R5          | ATG AGG AAG CCG AGA GCA TCT C     | 3,349,938- 959 (-)                                  |
| 12 | R6          | CCG GTA TGA GCG TCG GAA TTT       | 3,350,451- 471 (-)                                  |
| 13 | R7          | GCC CGG ATG TTT GTT TCG TTC       | 3,350,986-<br>3,351,006 (-)                         |
| 14 | R8          | TCA GTC TTT TTG GTC ACG GAC G     | 3,351,543- 564 (-)                                  |
| 15 | R9          | ACT CGC ACA TGC ATA CTC GCA       | 3,352,122- 142 (-)                                  |
| 16 | UV90AFor    | ACG TGG ACT GTT GCG TGA CAC       | 3,348,179- 199 (+)                                  |
| 17 | UV90ARev    | GTG TCA CGC AAC AGT CCA CGT       | 3,348,179- 199 (-)                                  |
| 18 | UV90BFor    | AAC TTT ACC GAT GCC GCT GC        | 3,348,687- 706 (+)                                  |
| 19 | UV90BRev    | GCA GCG GCA TCG GTA AAG TT        | 3,348,687- 706 (-)                                  |
| 20 | FlipR1For   | CTT TCC TGA TGC TGT TCC GGA       | 3,348,966- 986 (+)                                  |
| 21 | FlipR4For   | GAG ATG CGA CCA CAG CCA TTT       | 3,349,471- 491 (+)                                  |
| 22 | FlipF5Rev   | CCT TCC TTT CTT CGG AGG TTC C     | 3,346,425-404 (-)                                   |
| 23 | FlipF4Rev   | CAG GGA AGA TGA AGT CAT CCG G     | 3,346,883-862 (-)                                   |
| 24 | FlipF1Rev   | GCA GCA ACA AAT GTG TCA CGG       | 3,347,391-371 (-)                                   |
| 25 | FlipR6For   | AAA TTC CGA CGC TCA TAC CGG       | 3,350,451-471 (+)                                   |
| 26 | FlipR7For   | GAA CGA AAC AAA CAT CCG GGC       | 3,350,986-<br>3,351,006 (+)                         |
| 27 | FlipR8For   | CGT CCG TGA CCA AAA AGA CTG A     | 3,351,543-564 (+)                                   |
| 28 | 17F1        | ACG CTT CTT TCC TTA TCC CAC CCA C | 3,344,879-903 (+)                                   |
| 29 | 17F2        | AGG TAG AAG TTG GAA AGG TGC GCT G | 3,343,693-717 (+)                                   |
| 30 | 17F3        | TCG GTC TTG ATC GCT GGT TCT TAC G | 3,342,614-638 (+)                                   |
| 31 | 17F4        | GTA CGC CGT GTA TTT GTG TGT CTG G | 3,341,477-501 (+)                                   |
| 32 | 17F5        | TCC TCC ATC ACC AAC GCA CAA TGA C | 3,339,947-971 (+)                                   |
| 33 | 17F6        | AGC CCG CTA ACG CCA ATC TTA TAC   | 3,338,357-380 (+)                                   |
| 34 | 17F7        | AAT CTA AAG GAG GAG GAC CCG GAA G | 3,337,024-048 (+)                                   |
| 35 | 17F8        | CCG GCG CAA ACC ATC GAA ATT AAG   | 3,335,528-551 (+)                                   |
| 36 | 17F9        | CTT GTG AAT GGT TTG TGG CGG TTC C | 3,334,358-382 (+)                                   |
| 37 | 17F10       | TCT CCG TCT CCG TAT TGG GTA CAT C | 3,333,239-263 (+)                                   |
| 38 | 17F11       | CAT TGC CAT TCC CAA CAA CAG GTG   | 3,332,263-286 (+)                                   |

|    |              |                                   |                   |
|----|--------------|-----------------------------------|-------------------|
| 39 | 17F12        | GCC CAA CAA ACA ACG AAC AAC GAT C | 3,331,005-029 (+) |
| 40 | 17F13        | CAA CGG CAA CAA GCT GTA CGC TAG   | 3,329,680-703 (+) |
| 41 | 17F14        | AGT TCC GAC AGA GGT GCT ACA TGG   | 3,327,929-952 (+) |
| 42 | 17F15        | AAC AGC ACT GAC ATC AGC AAG CAA G | 3,326,728-752 (+) |
| 43 | 17F16        | GCT TGG CAT CCT TGT ACT CGT TGT C | 3,325,372-396 (+) |
| 44 | 17F17        | TCT CAA TCC ATT CGG GCT CAT CGT C | 3,324,110-134 (+) |
| 45 | 17F18        | ACT CGT ATT CTC TCC ATT GGG CTC G | 3,323,122-146 (+) |
| 46 | 17F19        | TGG TGT GAT GGA AAT GTA CGC GCT G | 3,321,779-803 (+) |
| 47 | 17F20        | CTG GAA CCC ATT TCT CGC ACA CAT C | 3,320,481-505 (+) |
| 48 | 17F21        | TTT GGT TGT CTG GTT GGC GTT ATC C | 3,319,264-288 (+) |
| 49 | 17F22        | GTG AGG CCA ACG ACT GAG AAA GTA G | 3,317,916-940 (+) |
| 50 | 17F23        | ACA GTG ACG AGA CCT TTG AGA GGA G | 3,316,708-732 (+) |
| 51 | 17F24        | CCT TGC TTC ACC ACG TTC TTA GCT C | 3,315,419-443 (+) |
| 52 | 17F25        | TAC ACT CTC TCT GTT GCT CGT CGT C | 3,314,341-365 (+) |
| 53 | 17F26        | TGT TGC TAT CGG ATG TGG AGG TTG G | 3,313,207-231 (+) |
| 54 | 17F27        | CTC CAT CGG TAC AGT CCA AAC CAT C | 3,312,220-244 (+) |
| 55 | 17F28        | TGA AGA CTG CCA CCA CGT TGA TAC   | 3,310,921-944 (+) |
| 56 | 17F29        | ATA CAA GAC ACG ACC ACA CGC CAA G | 3,309,813-837 (+) |
| 57 | 17F30        | GGC AAG TGT GGA TTG GTG ATG TGA G | 3,308,466-490 (+) |
| 58 | 17R1         | CAA CGG AGA GAG AGG GTG AAT GGA A | 3,351,689-665 (-) |
| 59 | 17R2         | CGA CAG GCA AAG GTA AGA AAG GGA G | 3,352,758-734 (-) |
| 60 | 17R3         | GAC AAT TTC CAC CGT GCT ACC ACC A | 3,353,926-902 (-) |
| 61 | 17R4         | GAG GGC CGG AAA GAA GTC AAA CCA A | 3,355,140-116 (-) |
| 62 | 17R5         | CCA CCC TCA CCG TTC AGA TAC TTC T | 3,356,189-165 (-) |
| 63 | 17R6         | CCT TCC ACT CAA CAG TTC GTC CGT T | 3357,753-729 (-)  |
| 64 | 17R7         | CAT ATT CCT ACT TGA CGC CGC TCA G | 3,358,854-830 (-) |
| 65 | 17R8         | CAA GTA CAC CAC TCC CAC CAC ACT   | 3,360,081-058 (-) |
| 66 | 17R9         | CTC TGT CCT TCT CCA GCC TTC TTG A | 3,361,047-023 (-) |
| 67 | 17R10        | CAA GAC GGG AGT GGA AGA GTC AAA G | 3,362,202-178 (-) |
| 68 | 17R11        | CAT GCC ATC CCA CTC CCT TGA AGA T | 3,363,468-444 (-) |
| 69 | 17R12        | CTC GGT CAA ATG GTG GAT GTG TTG C | 3,364,946-922 (-) |
| 70 | 17R13        | CCA AGT CCC ATG ACG AAG AGC AAT C | 3,366,785-761 (-) |
| 71 | 17R14        | CGT CTT GCC TAT TCC CAC TCC TTT C | 3,368,511-535 (-) |
| 72 | 17R6FlipFor  | AAC GGA CGA ACT GTT GAG TGG AAG G | 3357,729-753 (+)  |
| 73 | 17R7FlipFor  | CTG AGC GGC GTC AAG TAG GAA TAT G | 3,358,830-854 (+) |
| 74 | 17R8FlipFor  | AGT GTG GTG GGA GTG GTG TAC TTG   | 3,360,058-081 (+) |
| 75 | 17R9FlipFor  | TCA AGA AGG CTG GAG AAG GAC AGA G | 3,361,023-047 (+) |
| 76 | 17R10FlipFor | CTT TGA CTC TTC CAC TCC CGT CTT G | 3,362,178-202 (+) |
| 77 | 17R11FlipFor | ATC TTC AAG GGA GTG GGA TGG CAT G | 3,363,444-468 (+) |
| 78 | 17R12FlipFor | GCA ACA CAT CCA CCA TTT GAC CGA G | 3,364,922-946 (+) |
| 79 | 17R13FlipFor | GAT TGC TCT TCG TCA TGG GAC TTG G | 3,366,761-785 (+) |
| 80 | 17F6FlipRev  | GTA TAA GAT TGG CGT TAG CGG GCT   | 3,338,380-357 (-) |
| 81 | 17F7FlipRev  | CTT CCG GGT CCT CCT CCT TTA GAT T | 3,337,048-024 (-) |
| 82 | 17F8FlipRev  | CTT AAT TTC GAT GGT TTG CGC CGG   | 3,335,551-528 (-) |
| 83 | 17F9FlipRev  | GGA ACC GCC ACA AAC CAT TCA CAA G | 3,334,382-358 (-) |

|     |              |                                   |                   |
|-----|--------------|-----------------------------------|-------------------|
| 84  | 17F10FlipRev | TCT CCG TCT CCG TAT TGG GTA CAT C | 3,333,263-239 (-) |
| 85  | 17F11FlipRev | CAC CTG TTG TTG GGA ATG GCA ATG   | 3,332,286-263 (-) |
| 86  | 17F12FlipRev | GAT CGT TGT TCG TTG TTT GTT GGG C | 3,331,029-005 (-) |
| 87  | 17F13FlipRev | CTA GCG TAC AGC TTG TTG CCG TTG   | 3,329,703-680 (-) |
| 88  | 17F14FlipRev | CCA TGT AGC ACC TCT GTC GGA ACT   | 3,327,952-929 (-) |
| 89  | 17F15FlipRev | CTT GCT TGC TGA TGT CAG TGC TGT T | 3,326,752-728 (-) |
| 90  | 17F16FlipRev | GAC AAC GAG TAC AAG GAT GCC AAG C | 3,325,396-372 (-) |
| 91  | 17F17FlipRev | GAC GAT GAG CCC GAA TGG ATT GAG A | 3,324,134-110 (-) |
| 92  | 17F18FlipRev | CGA GCC CAA TGG AGA GAA TAC GAG T | 3,323,146-122 (-) |
| 93  | 17F19FlipRev | CAG CGC GTA CAT TTC CAT CAC ACC A | 3,321,803-779 (-) |
| 94  | 17F20FlipRev | GAT GTG TGC GAG AAA TGG GTT CCA G | 3,320,505-481 (-) |
| 95  | 17F21FlipRev | GGA TAA CGC CAA CCA GAC AAC CAA A | 3,319,288-264 (-) |
| 96  | 17F22FlipRev | CTA CTT TCT CAG TCG TTG GCC TCA C | 3,317,940-916 (-) |
| 97  | 17F23FlipRev | CTC CTC TCA AAG GTC TCG TCA CTG T | 3,316,732-708 (-) |
| 98  | 17F24FlipRev | GAG CTA AGA ACG TGG TGA AGC AAG G | 3,315,443-419 (-) |
| 99  | 17F25FlipRev | GAC GAC GAG CAA CAG AGA GAG TGT A | 3,314,365-341 (-) |
| 100 | 17F26FlipRev | CCA ACC TCC ACA TCC GAT AGC AAC A | 3,313,231-207 (-) |
| 101 | 17F27FlipRev | GAT GGT TTG GAC TGT ACC GAT GGA G | 3,312,244-220 (-) |
| 102 | 17F28FlipRev | GTA TCA ACG TGG TGG CAG TCT TCA   | 3,310,944-921 (-) |
| 103 | 17F29FlipRev | CTT GGC GTG TGG TCG TGT CTT GTA T | 3,309,837-813 (-) |
| 104 | 18SeqF1      | GAC CCT GAC ACG AAA TAA ACG TGC   | 3,320,837-860 (+) |
| 105 | 18SeqR1      | CTC TAA TGC CGC TAA TCC ACG GAT   | 3,357,216-193 (-) |
| 106 | 18SeqF2      | TCC CTA TCC CAC TCG AAC ATA ATG C | 3,321,025-049 (+) |
| 107 | 18SeqR2      | GAC CGG CTT CTA CTC TCG TTC AA    | 3,356,726-704 (-) |
| 108 | 18SeqR3      | CAC ACG CAA AGA GAG GAA GGA GAC A | 3,356,267-243 (-) |

Primers #1-15 ordered from Invitrogen. All other primers ordered from Integrated DNA Technologies (IDT).
