# Supplementary material for: A component of the TOR (Target Of Rapamycin) nutrient-sensing pathway plays a role in circadian rhythmicity in Neurospora crassa
Source: PubMed Central journal article supplement (PMC6028147; doi:10.1371/journal.pgen.1007457), 2018-06-20
Supplement: pgen.1007457.s005.pdf [file pgen.1007457.s005.pdf]

**S5 Table. Top ten sequences similar to NCU05950\***

| <b>NCBI/Gene bank sequence reference number</b> | <b>Protein function and name</b>       | <b>Organism</b>                   | <b>E value</b> |
|-------------------------------------------------|----------------------------------------|-----------------------------------|----------------|
| XP_009854653.1                                  | Hypothetical protein NEUTE1DRAFT_69638 | <i>Neurospora tetrasperma</i>     | 5e-114         |
| XP_003349138.1                                  | Hypothetical protein SMAC_06974        | <i>Sordaria macrospora</i>        | 1e-103         |
| XP_003650216.1                                  | Hypothetical protein THITE_2063314     | <i>Thielavia terrestris</i>       | 2e-60          |
| KXX83062.1                                      | Hypothetical protein MMYC01_200469     | <i>Madurella mycetomatis</i>      | 6e-59          |
| XP_001227334.1                                  | Hypothetical protein CHGG_09407        | <i>Chaetomium globosum</i>        | 8e-57          |
| XP_006696736.1                                  | Hypothetical protein CTHT_0064310      | <i>Chaetomium thermophilum</i>    | 2e-56          |
| XP_003663911.1                                  | Hypothetical protein MYCTH_2315477     | <i>Myceliophthora thermophile</i> | 1e-55          |
| XP_001906340.1                                  | Hypothetical protein                   | <i>Podospora anserina</i>         | 3e-48          |
| XP_008095402.1                                  | Hypothetical protein GLRG_06526        | <i>Colletotrichum graminicola</i> | 4e-39          |
| KZL63082.1                                      | Hypothetical protein CI238_05869       | <i>Colletotrichum incanum</i>     | 2e-38          |

\*The NCU05950 protein sequence was used as the query for a protein BLAST search in the NCBI database of non-redundant coding sequences from GenBank.
