# Supplementary material for: A component of the TOR (Target Of Rapamycin) nutrient-sensing pathway plays a role in circadian rhythmicity in Neurospora crassa
Source: PubMed Central journal article supplement (PMC6028147; doi:10.1371/journal.pgen.1007457), 2018-06-20
Supplement: pgen.1007457.s006.pdf [file pgen.1007457.s006.pdf]

**S6 Table. Periods and growth rates of NCU05950 mutants and transformants**

| Genotype                                             | Number of Isolates | + choline       |                    | - choline       |                    |
|------------------------------------------------------|--------------------|-----------------|--------------------|-----------------|--------------------|
|                                                      |                    | period (h)      | growth rate (mm/h) | period (h)      | growth rate (mm/h) |
| control                                              | 1                  | 21.9 ± 0.2 (12) | 1.38 ± 0.04 (12)   | 47.3 ± 1.8 (16) | 0.54 ± 0.01 (16)   |
| <i>frq<sup>null</sup></i>                            | 1                  | N.R.            | 1.46 ± 0.01 (4)    | 56.5 ± 4.3 (8)  | 0.50 ± 0.01 (8)    |
| <i>uv90</i>                                          | 1                  | 22.1 ± 0.2 (12) | 1.20 ± 0.02 (12)   | N.R.            | 0.52 ± 0.01 (16)   |
| <i>uv90 frq<sup>null</sup></i>                       | 1                  | N.R.            | 1.28 ± 0.03 (12)   | N.R.            | 0.57 ± 0.01 (16)   |
| NCU05950 <sup>KO</sup>                               | 1                  | 23.1 ± 0.6 (8)  | 1.19 ± 0.02 (8)    | N.R.            | 0.50 ± 0.02 (8)    |
| NCU05950 <sup>KO</sup> <i>frq<sup>null</sup></i>     | 1                  | N.R.            | 1.18 ± 0.01 (8)    | N.R.            | 0.51 ± 0.01 (8)    |
| <i>uv90</i> NCU05950 <sup>+</sup>                    | 3                  | 21.2 ± 0.1 (12) | 1.39 ± 0.01 (12)   | 57.6 ± 3.0 (24) | 0.48 ± 0.01 (24)   |
| <i>uv90 frq<sup>null</sup></i> NCU05950 <sup>+</sup> | 3                  | N.R.            | 1.39 ± 0.02 (12)   | 61.2 ± 2.9 (23) | 0.49 ± 0.01 (24)   |

Genotype abbreviations as for Fig. 2. All strains are also *csp-1*; *ras<sup>bd</sup> chol-1*.

Data from transformants pooled from several independent isolates with the indicated genotype.

Strains were grown with (+) or without (-) 100 μM choline in the medium.

Data reported as mean ± S.E.M. (N)

N.R.: Not rhythmic
