# Supplementary material for: A component of the TOR (Target Of Rapamycin) nutrient-sensing pathway plays a role in circadian rhythmicity in Neurospora crassa
Source: PubMed Central journal article supplement (PMC6028147; doi:10.1371/journal.pgen.1007457), 2018-06-20
Supplement: pgen.1007457.s007.pdf [file pgen.1007457.s007.pdf]

**S7 Table. Periods and growth rates of NCU05950-GFP and -FLAG fusion proteins**

| Genotype               | Number of Isolates | + choline       |                    | - choline       |                    |
|------------------------|--------------------|-----------------|--------------------|-----------------|--------------------|
|                        |                    | period (h)      | growth rate (mm/h) | period (h)      | growth rate (mm/h) |
| control                | 1                  | 21.3 ± 0.1 (10) | 1.34 ± 0.02 (10)   | 51.8 ± 1.7 (10) | 0.49 ± 0.01 (10)   |
| NCU05950 <sup>KO</sup> | 1                  | 22.3 ± 0.3 (10) | 1.16 ± 0.04 (10)   | N.R.            | 0.49 ± 0.01 (10)   |
| pCCG::NCU05950::GFP    | 6                  | 21.5 ± 0.1 (18) | 1.24 ± 0.01 (18)   | 57.7 ± 2.0 (18) | 0.47 ± 0.01 (18)   |
| NCU05950::GFP          | 4                  | 21.4 ± 0.1 (12) | 1.21 ± 0.01 (12)   | 54.4 ± 3.0 (11) | 0.46 ± 0.01 (12)   |
| NCU05950::FLAG         | 4                  | 22.0 ± 0.1 (16) | 1.28 ± 0.01 (16)   | 45.6 ± 1.5 (14) | 0.51 ± 0.01 (14)   |
| Δ1-NCU05950::FLAG      | 2                  | 21.9 ± 0.2 (8)  | 1.27 ± 0.003 (8)   | 47.7 ± 2.8 (8)  | 0.49 ± 0.01 (8)    |
| Δ7-NCU05950::FLAG      | 2                  | 23.4 ± 0.3 (8)  | 1.17 ± 0.06 (8)    | N.R.            | 0.50 ± 0.01 (8)    |
| Δ10-NCU05950::FLAG     | 2                  | 24.2 ± 0.3 (8)  | 1.04 ± 0.01 (8)    | N.R.            | 0.50 ± 0.01 (8)    |

Genotype abbreviations as for Fig. 6. All strains are also *csp-1*; *ras<sup>bd</sup>* *chol-1*.

Data from transformants pooled from several independent isolates with the indicated genotype.

Strains were grown with (+) or without (-) 100 μM choline in the medium.

Data reported as mean ± S.E.M. (N)

N.R.: Not rhythmic
