# Supplementary material for: A component of the TOR (Target Of Rapamycin) nutrient-sensing pathway plays a role in circadian rhythmicity in Neurospora crassa
Source: PubMed Central journal article supplement (PMC6028147; doi:10.1371/journal.pgen.1007457), 2018-06-20
Supplement: pgen.1007457.s008.pdf [file pgen.1007457.s008.pdf]

**S8 Table. Periods and growth rates of GFP-tagged N-terminal deletion strains**

| Genotype               | + choline   |                    | - choline  |                    |
|------------------------|-------------|--------------------|------------|--------------------|
|                        | period (h)  | growth rate (mm/h) | period (h) | growth rate (mm/h) |
| control                | 21.3 ± 0.08 | 1.55 ± 0.01        | 46.3 ± 4.5 | 0.53 ± 0.03        |
| NCU05950 <sup>KO</sup> | 22.4 ± 0.01 | 1.36 ± 0.01        | N.R.       | 0.53 ± 0.03        |
| NCU05950::GFP          | 21.2 ± 0.04 | 1.46 ± 0.003       | 38.8 ± 1.8 | 0.54 ± 0.01        |
| Δ1-NCU05950::GFP       | 21.6 ± 0.14 | 1.47 ± 0.01        | 43.5 ± 2.0 | 0.52 ± 0.003       |
| Δ7-NCU05950::GFP       | 22.0 ± 0.16 | 1.41 ± 0.003       | N.R.       | 0.56 ± 0.01        |
| Δ10-NCU05950::GFP      | 22.1 ± 0.13 | 1.48 ± 0.01        | N.R.       | 0.56 ± 0.01        |

Genotype abbreviations as for S4 Fig. All strains are also *csp-1*; *ras<sup>bd</sup> chol-1*.

Strains were grown with (+) or without (-) 100 μM choline in the medium.

Data are from one isolate of each genotype and three replicate race tubes per condition.

Data are reported as mean ± S.E.M. (N=3)

N.R.: Not rhythmic
