# Supplementary material for: A component of the TOR (Target Of Rapamycin) nutrient-sensing pathway plays a role in circadian rhythmicity in Neurospora crassa
Source: PubMed Central journal article supplement (PMC6028147; doi:10.1371/journal.pgen.1007457), 2018-06-20

17F21 - 17F20FlipRev  
1242 bp

17F20 - 17F19FlipRev  
1323 bp

17R5FlipFor - 17R6  
1589 bp

17R6FlipFor - 17R7  
1126 bp

control 1  
uv90 1  
control 2  
uv90 2

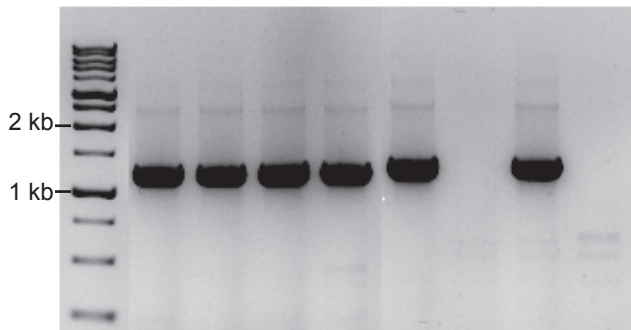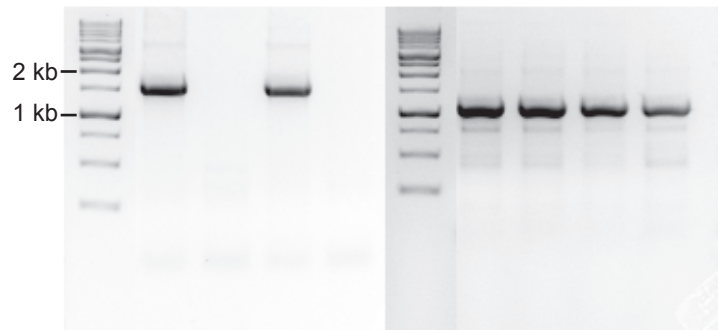

17F21 - 17R7  
predicted = 39,591 bp  
observed in mutant = 4463 bp

17F22 - 17R8  
predicted = 42,166 bp  
observed in mutant = 7038 bp

control 1  
uv90 1  
control 2  
uv90 2

control 1  
uv90 1  
control 2  
uv90 2

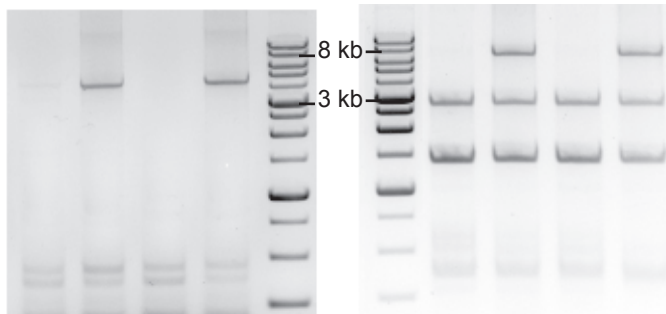

Supplement: pgen.1007457.s009.pdf [file pgen.1007457.s009.pdf]
