# Supplementary material for: A component of the TOR (Target Of Rapamycin) nutrient-sensing pathway plays a role in circadian rhythmicity in Neurospora crassa
Source: PubMed Central journal article supplement (PMC6028147; doi:10.1371/journal.pgen.1007457), 2018-06-20

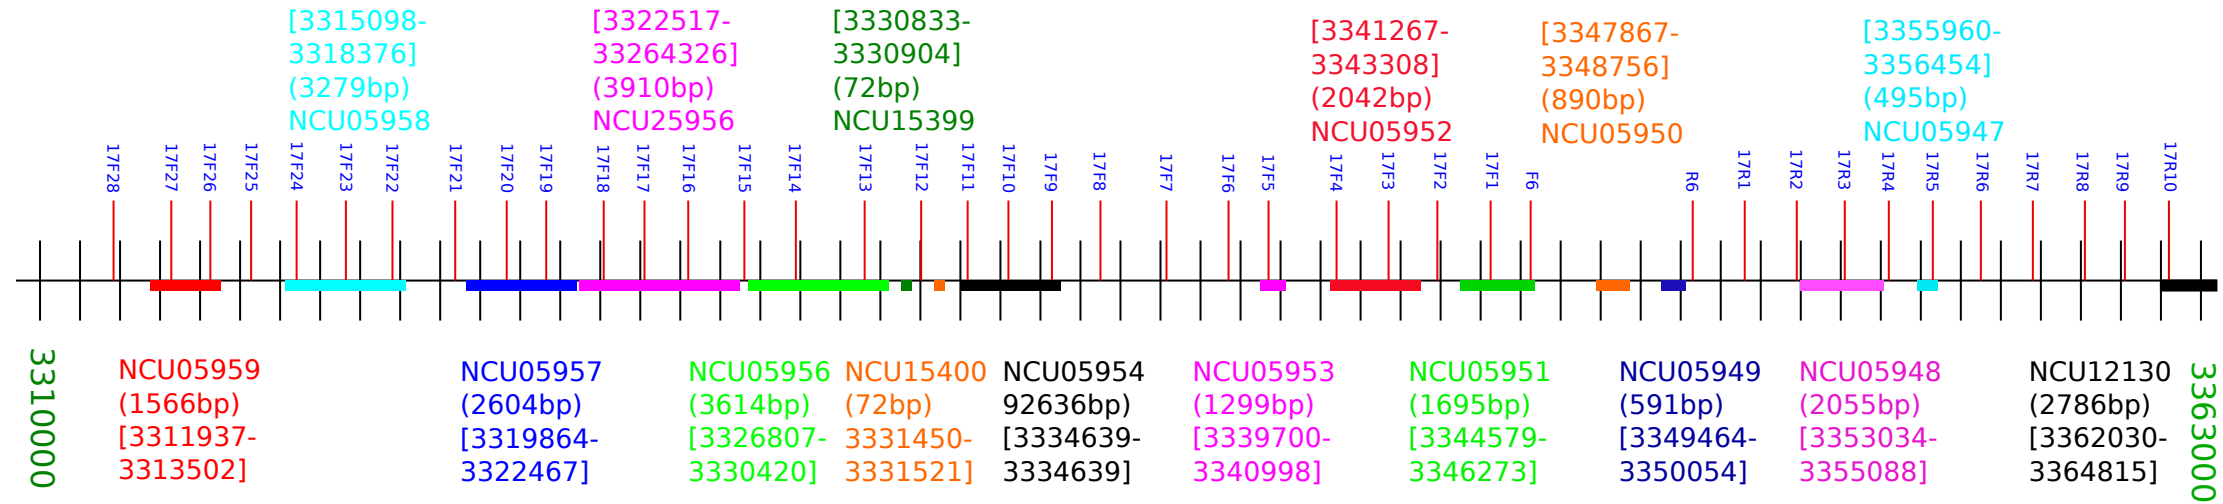

Successful PCR product only from wild type

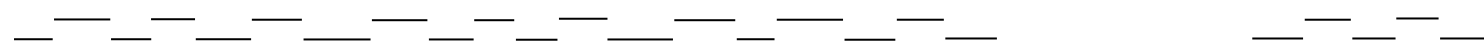

Successful PCR product from wild type and mutant type

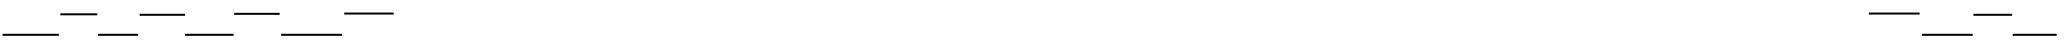

Long range PCR products expected from wild type and mutant type

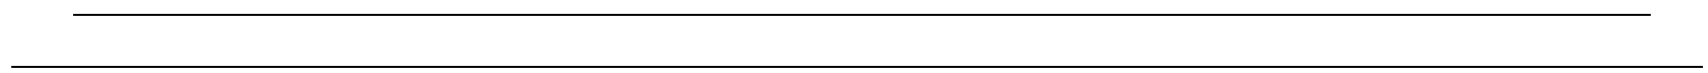

PCR products observed from mutant type

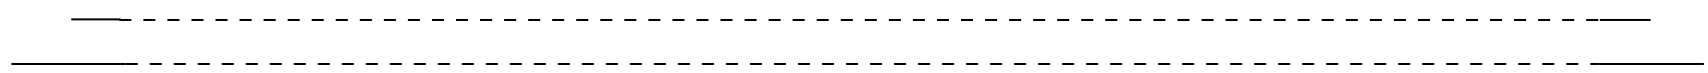

Supplement: pgen.1007457.s010.pdf [file pgen.1007457.s010.pdf]
