# Supplementary material for: A component of the TOR (Target Of Rapamycin) nutrient-sensing pathway plays a role in circadian rhythmicity in Neurospora crassa
Source: PubMed Central journal article supplement (PMC6028147; doi:10.1371/journal.pgen.1007457), 2018-06-20
Supplement: pgen.1007457.s011.pdf [file pgen.1007457.s011.pdf]

***N. crassa* vs. *S. cerevisiae***

```
N   1  MGNFCSTCFGGRRSDDYDEEDDEAQLFDENNMHYGS-----FDOQHMM 43
      ||...|. | .:..:| | :| | | ..|...| | | :|.:.|.
S   1  MGAVLSCC-----RNHSGEENEA--LLREQQAGYGSQGNANDEYDAEQMR 43

N  44  NQEDPOETEREIAA----LOGVVERTSNNMVDI-----YDMVPHDKPMQD 84
      .:| .|.|:..:| | :.:|. .|:..:| | | .:|. . . . . :| :
S  44  LKE--HEHEQKLLAREQELRDIVANTNDKLIDISMINNSGIVIQGTDLQE 91

N  85  APAPYGFANQRYNALLSKLSTHDDMAAVARVDWGTPEDDSMEMLRKASLP 134
      | .|. . . . . . . | | .|. | . |
S  92  A-----LDKRQQEEG-----GDSREDERSA--- 111

N 135  TIPIKAEGGEALVGNFTDAAAAMR----- 158
      | .: . | . | : . . . : . . . :
S 112  -----GDDNLSGHSVPSSGSAQATTHQTAPRTNTFTLLTSPDSAKISK 154

N 159  ----- 158

S 155  EQLKKLHSNILNEIFSQSQVKNKPGPLTVPF 184
```

Identity: 37/230 (16.1%)  
Similarity: 61/230 (26.5%)  
Gaps: 118/230 (51.3%)  
Score: 49.5

***N.crassa* vs. *H. sapiens***

```

N   1  MGNFCSTCFGGRRSDDYDEEDDEAQLFDENN----MHYGSFDQOHMMNOE  46
      ||  |  |  |  :.....|.....:|.:.|.|.:.:  ...|:.....|.:
H   1  MG--C--CYSSENEDSDQDRERKLLDPSSPPTKALNGAEPNYHSL---  43

N  47  DPQETEREIAALQGVVERTSNMVDI----YDMVPHDKPMQDAPAPYGF  91
      |.....|.|.|.:.:.:|.:.:|.:.:  ..|.|.|.:.  |..
H  44  -PSARTDEQALLSSILAKTASNIIDVSAADSQGMEQHE-----YMD  83

N  92  ANQRYN---ALLSKLSTHDDMAAVARVDWGTPEDDSMEMLRKASLPTIP-  137
      .:.:|.:.  |:|.|...||  |  ..|||.:.|
H  84  RARQYSTRLAVLSSSLTH-----W-----KKLPPLPS  110

N 138  IKAEGGEALVGN---FTDAAAAMR-----  158
      :.:.:.:.|.:.  |:|.:.:.|
H 111  LTSQPHQVLASEPIPFSDLQQVSRIAAYAYSALSQIRVDAKEELVVQFGI  160

N 159 - 158

H 161 P 161

```

Identity: 34/201 (16.9%)  
 Similarity: 61/201 (30.3%)  
 Gaps: 83/201 (41.3%)  
 Score: 55.5

**KEY:**

Conserved LAMTOR domains: **blue**  
 Potential myristoylation sites: **yellow**  
 Potential palmitoylation sites: **green**  
 Potential lysosomal/vacuolar localization signals: **underlined bold**  
 | Identity  
 . : Similarities
