# Supplementary material for: A component of the TOR (Target Of Rapamycin) nutrient-sensing pathway plays a role in circadian rhythmicity in Neurospora crassa
Source: PubMed Central journal article supplement (PMC6028147; doi:10.1371/journal.pgen.1007457), 2018-06-20

+ choline

- choline

control

NCU05950<sup>KO</sup>

NCU05950::GFP

$\Delta$ 1-NCU05950::GFP

$\Delta$ 7-NCU05950::GFP

$\Delta$ 10-NCU05950::GFP

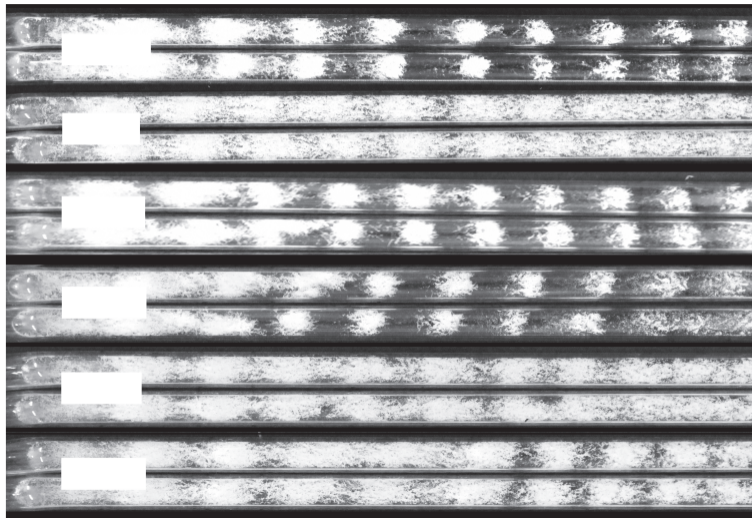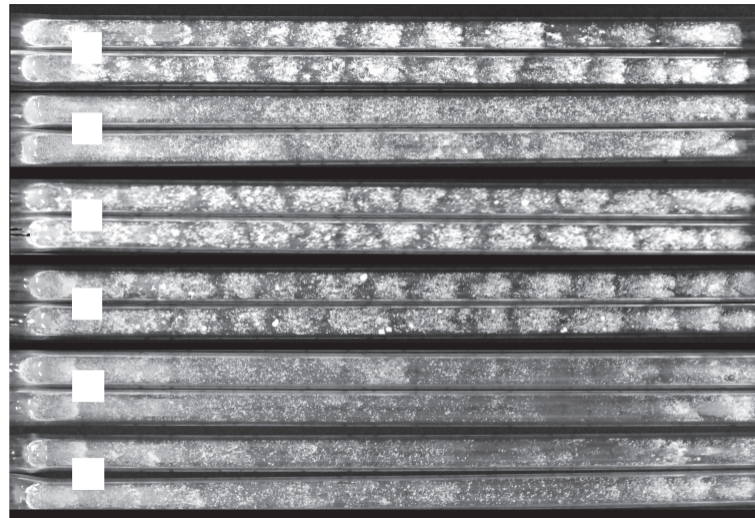

Supplement: pgen.1007457.s012.pdf [file pgen.1007457.s012.pdf]
