# Supplementary material for: A component of the TOR (Target Of Rapamycin) nutrient-sensing pathway plays a role in circadian rhythmicity in Neurospora crassa
Source: PubMed Central journal article supplement (PMC6028147; doi:10.1371/journal.pgen.1007457), 2018-06-20
Supplement: pgen.1007457.s014.pdf [file pgen.1007457.s014.pdf]

*ccg-1* promoter

native promoter

control

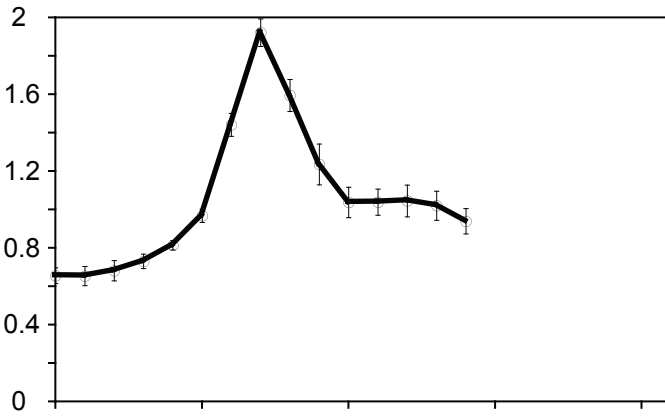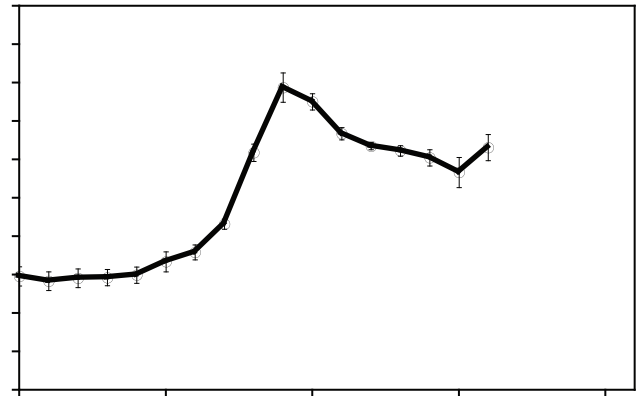

$\Delta 1$

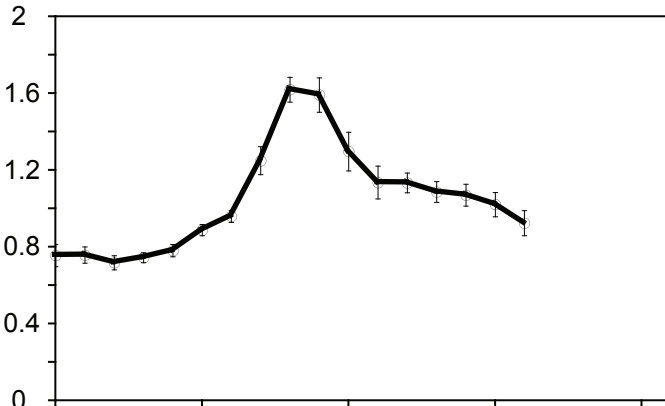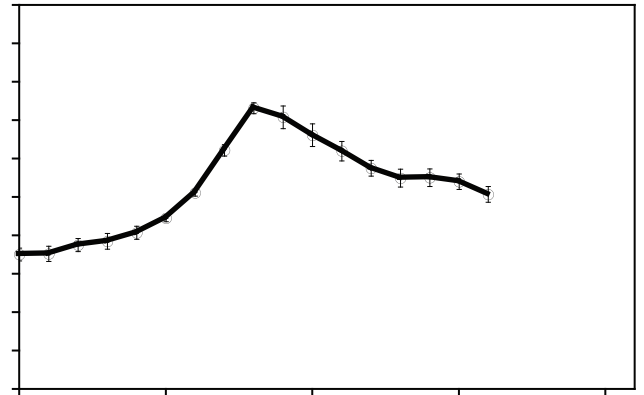

$\Delta 7$

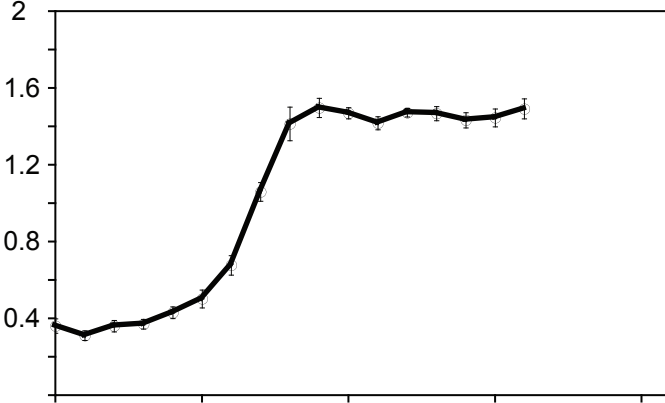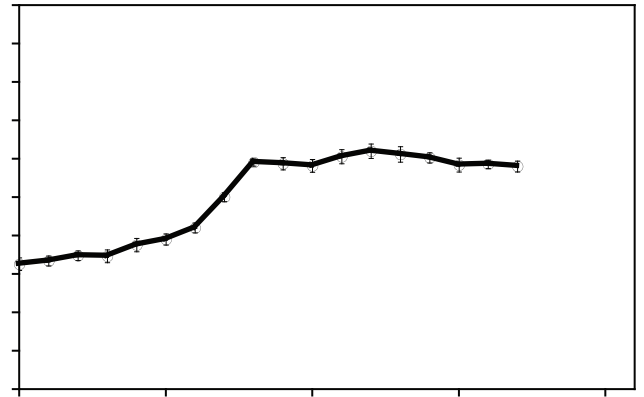

$\Delta 10$

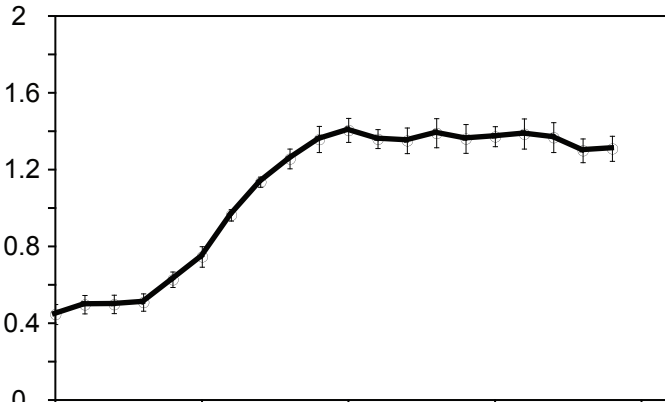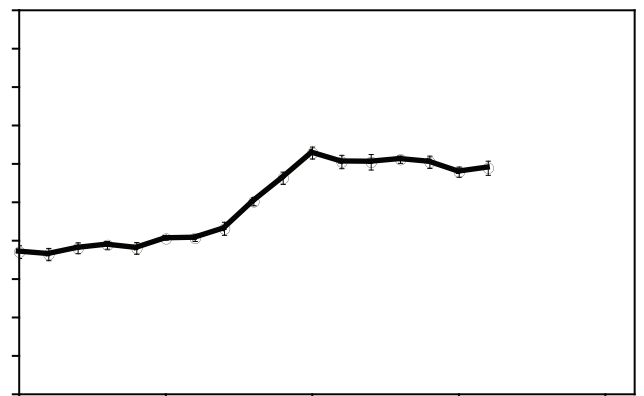

normalized pixel brightness

pixel number

pixel number
